# Supplementary material
Source: publisher figshare collection journal article supplement (https://acs.figshare.com/ndownloader/files/5700105)
Supplement: Supplementary file 1 [file 5700105]

  
data_rab37 
  
_audit_creation_method            SHELXL-97 
_chemical_name_systematic 
; 
 ? 
; 
_chemical_name_common             ? 
_chemical_melting_point           ? 
_chemical_formula_moiety          ? 
_chemical_formula_sum 
 'C32 H33 O3 Sm' 
_chemical_formula_weight          615.93 
  
loop_ 
 _atom_type_symbol 
 _atom_type_description 
 _atom_type_scat_dispersion_real 
 _atom_type_scat_dispersion_imag 
 _atom_type_scat_source 
 'C'  'C'   0.0033   0.0016 
 'International Tables Vol C Tables 4.2.6.8 and 6.1.1.4' 
 'H'  'H'   0.0000   0.0000 
 'International Tables Vol C Tables 4.2.6.8 and 6.1.1.4' 
 'Sm'  'Sm'  -0.1638   3.4418 
 'International Tables Vol C Tables 4.2.6.8 and 6.1.1.4' 
 'O'  'O'   0.0106   0.0060 
 'International Tables Vol C Tables 4.2.6.8 and 6.1.1.4' 
  
_symmetry_cell_setting            Orthorhombic 
_symmetry_space_group_name_H-M    Pbca 
  
loop_ 
 _symmetry_equiv_pos_as_xyz 
 'x, y, z' 
 '-x+1/2, -y, z+1/2' 
 '-x, y+1/2, -z+1/2' 
 'x+1/2, -y+1/2, -z' 
 '-x, -y, -z' 
 'x-1/2, y, -z-1/2' 
 'x, -y-1/2, z-1/2' 
 '-x-1/2, y-1/2, z' 
  
_cell_length_a                    8.3673(11) 
_cell_length_b                    19.780(3) 
_cell_length_c                    32.181(4) 
_cell_angle_alpha                 90.00 
_cell_angle_beta                  90.00 
_cell_angle_gamma                 90.00 
_cell_volume                      5326.1(12) 
_cell_formula_units_Z             8 
_cell_measurement_temperature     150(2) 
_cell_measurement_reflns_used     1007 
_cell_measurement_theta_min       3.43 
_cell_measurement_theta_max       27.97 
  
_exptl_crystal_description        block 
_exptl_crystal_colour             red 
_exptl_crystal_size_max           0.25 
_exptl_crystal_size_mid           0.25 
_exptl_crystal_size_min           0.20 
_exptl_crystal_density_meas       '?' 
_exptl_crystal_density_diffrn     1.536 
_exptl_crystal_density_method     'not measured' 
_exptl_crystal_F_000              2488 
_exptl_absorpt_coefficient_mu     2.236 
_exptl_absorpt_correction_type    'multi-scan'
_exptl_absorpt_correction_T_min   0.6048 
_exptl_absorpt_correction_T_max   0.6633 
_exptl_absorpt_process_details    'sadabs' 
  
_exptl_special_details 
; 
 ? 
; 
  
_diffrn_ambient_temperature       150(2) 
_diffrn_radiation_wavelength      0.71073 
_diffrn_radiation_type            MoK\a 
_diffrn_radiation_source          'fine-focus sealed tube' 
_diffrn_radiation_monochromator   graphite 
_diffrn_measurement_device_type   'CCD area detector' 
_diffrn_measurement_method        'phi and omega scans' 
_diffrn_detector_area_resol_mean  ? 
_diffrn_standards_number          ? 
_diffrn_standards_interval_count  ? 
_diffrn_standards_interval_time   ? 
_diffrn_standards_decay_%         ? 
_diffrn_reflns_number             30152 
_diffrn_reflns_av_R_equivalents   0.0251 
_diffrn_reflns_av_sigmaI/netI     0.0200 
_diffrn_reflns_limit_h_min        -10 
_diffrn_reflns_limit_h_max        10 
_diffrn_reflns_limit_k_min        -25 
_diffrn_reflns_limit_k_max        23 
_diffrn_reflns_limit_l_min        -32 
_diffrn_reflns_limit_l_max        41 
_diffrn_reflns_theta_min          2.15 
_diffrn_reflns_theta_max          27.00 
_reflns_number_total              5802 
_reflns_number_gt                 5205 
_reflns_threshold_expression      >2sigma(I) 
  
_computing_data_collection        'Bruker SMART' 
_computing_cell_refinement        'Bruker SMART' 
_computing_data_reduction         'Bruker SAINT' 
_computing_structure_solution     'SHELXS-97 (Sheldrick, 1990)' 
_computing_structure_refinement   'SHELXL-97 (Sheldrick, 1997)' 
_computing_molecular_graphics     'Bruker SHELXTL' 
_computing_publication_material   'Bruker SHELXTL' 
  
_refine_special_details 
; 
 Refinement of F^2^ against ALL reflections.  The weighted R-factor wR and 
 goodness of fit S are based on F^2^, conventional R-factors R are based 
 on F, with F set to zero for negative F^2^. The threshold expression of 
 F^2^ > 2sigma(F^2^) is used only for calculating R-factors(gt) etc. and is 
 not relevant to the choice of reflections for refinement.  R-factors based 
 on F^2^ are statistically about twice as large as those based on F, and R- 
 factors based on ALL data will be even larger. 
; 
  
_refine_ls_structure_factor_coef  Fsqd 
_refine_ls_matrix_type            full 
_refine_ls_weighting_scheme       calc 
_refine_ls_weighting_details 
 'calc w=1/[\s^2^(Fo^2^)+(0.0379P)^2^+8.5969P] where P=(Fo^2^+2Fc^2^)/3' 
_atom_sites_solution_primary      direct 
_atom_sites_solution_secondary    difmap 
_atom_sites_solution_hydrogens    geom 
_refine_ls_hydrogen_treatment     mixed 
_refine_ls_extinction_method      none 
_refine_ls_extinction_coef        ? 
_refine_ls_number_reflns          5802 
_refine_ls_number_parameters      325 
_refine_ls_number_restraints      0 
_refine_ls_R_factor_all           0.0325 
_refine_ls_R_factor_gt            0.0285 
_refine_ls_wR_factor_ref          0.0747 
_refine_ls_wR_factor_gt           0.0723 
_refine_ls_goodness_of_fit_ref    1.055 
_refine_ls_restrained_S_all       1.055 
_refine_ls_shift/su_max           0.034 
_refine_ls_shift/su_mean          0.003 
  
loop_ 
 _atom_site_label 
 _atom_site_type_symbol 
 _atom_site_fract_x 
 _atom_site_fract_y 
 _atom_site_fract_z 
 _atom_site_U_iso_or_equiv 
 _atom_site_adp_type 
 _atom_site_occupancy 
 _atom_site_symmetry_multiplicity 
 _atom_site_calc_flag 
 _atom_site_refinement_flags 
 _atom_site_disorder_assembly 
 _atom_site_disorder_group 
Sm1 Sm 0.438563(16) 0.398599(7) 0.104476(4) 0.01757(6) Uani 1 1 d . . . 
O1 O 0.2787(2) 0.50991(10) 0.10510(6) 0.0258(5) Uani 1 1 d . . . 
O2 O 0.2557(2) 0.31576(10) 0.14181(6) 0.0217(4) Uani 1 1 d . . . 
O3 O 0.1951(3) 0.38068(11) 0.05890(7) 0.0326(5) Uani 1 1 d . . . 
C1 C 0.5528(4) 0.34991(17) 0.02982(10) 0.0302(7) Uani 1 1 d . . . 
H1A H 0.5121 0.3346 0.0039 0.036 Uiso 1 1 calc R . . 
C2 C 0.5840(4) 0.41948(17) 0.02993(10) 0.0295(7) Uani 1 1 d . . . 
H2A H 0.5517 0.4408 0.0048 0.035 Uiso 1 1 calc R . . 
C3 C 0.6520(4) 0.46565(15) 0.05846(10) 0.0282(7) Uani 1 1 d . . . 
H3A H 0.6533 0.5107 0.0483 0.034 Uiso 1 1 calc R . . 
C4 C 0.7180(3) 0.45986(16) 0.09836(10) 0.0270(6) Uani 1 1 d . . . 
H4A H 0.7551 0.5019 0.1089 0.032 Uiso 1 1 calc R . . 
C5 C 0.7421(4) 0.40634(16) 0.12644(10) 0.0288(7) Uani 1 1 d . . . 
H5A H 0.7977 0.4203 0.1507 0.035 Uiso 1 1 calc R . . 
C6 C 0.7039(3) 0.33748(16) 0.12718(9) 0.0271(6) Uani 1 1 d . . . 
H6A H 0.7346 0.3164 0.1525 0.033 Uiso 1 1 calc R . . 
C7 C 0.6306(4) 0.29172(15) 0.09939(10) 0.0279(7) Uani 1 1 d . . . 
H7A H 0.6219 0.2473 0.1104 0.034 Uiso 1 1 calc R . . 
C8 C 0.5678(4) 0.29739(16) 0.05911(10) 0.0300(7) Uani 1 1 d . . . 
H8A H 0.5252 0.2559 0.0492 0.036 Uiso 1 1 calc R . . 
C9 C 0.4042(3) 0.43691(14) 0.17939(8) 0.0198(5) Uani 1 1 d . . . 
C10 C 0.3959(4) 0.50621(14) 0.19061(9) 0.0229(6) Uani 1 1 d . . . 
C11 C 0.3539(4) 0.52792(15) 0.23049(10) 0.0326(7) Uani 1 1 d . . . 
H11A H 0.3491 0.5749 0.2365 0.039 Uiso 1 1 calc R . . 
C12 C 0.3193(5) 0.48131(16) 0.26118(10) 0.0378(8) Uani 1 1 d . . . 
H12A H 0.2843 0.4959 0.2878 0.045 Uiso 1 1 calc R . . 
C13 C 0.3362(4) 0.41311(15) 0.25265(9) 0.0303(7) Uani 1 1 d . . . 
H13A H 0.3188 0.3808 0.2740 0.036 Uiso 1 1 calc R . . 
C14 C 0.3789(4) 0.39157(13) 0.21269(9) 0.0226(6) Uani 1 1 d . . . 
C15 C 0.4410(3) 0.55910(14) 0.15983(9) 0.0224(6) Uani 1 1 d . . . 
C16 C 0.3833(4) 0.56072(14) 0.11928(9) 0.0242(6) Uani 1 1 d . . . 
C17 C 0.4293(4) 0.60984(15) 0.09048(11) 0.0295(7) Uani 1 1 d . . . 
H17A H 0.3856 0.6100 0.0632 0.035 Uiso 1 1 calc R . . 
C18 C 0.5400(4) 0.65848(16) 0.10233(11) 0.0338(8) Uani 1 1 d . . . 
H18A H 0.5743 0.6918 0.0830 0.041 Uiso 1 1 calc R . . 
C19 C 0.6001(4) 0.65818(15) 0.14236(11) 0.0333(7) Uani 1 1 d . . . 
H19A H 0.6758 0.6914 0.1505 0.040 Uiso 1 1 calc R . . 
C20 C 0.5507(4) 0.60962(15) 0.17073(11) 0.0298(7) Uani 1 1 d . . . 
H20A H 0.5923 0.6107 0.1982 0.036 Uiso 1 1 calc R . . 
C21 C 0.1185(4) 0.51800(17) 0.12078(13) 0.0411(8) Uani 1 1 d . . . 
H21A H 0.0847 0.5651 0.1173 0.062 Uiso 1 1 calc R . . 
H21B H 0.1159 0.5061 0.1503 0.062 Uiso 1 1 calc R . . 
H21C H 0.0458 0.4883 0.1054 0.062 Uiso 1 1 calc R . . 
C22 C 0.4017(4) 0.31733(14) 0.20676(9) 0.0225(6) Uani 1 1 d . . . 
C23 C 0.3380(3) 0.28115(14) 0.17357(8) 0.0206(6) Uani 1 1 d . . . 
C24 C 0.3554(4) 0.21211(14) 0.16956(10) 0.0284(7) Uani 1 1 d . . . 
H24A H 0.3061 0.1890 0.1471 0.034 Uiso 1 1 calc R . . 
C25 C 0.4451(4) 0.17669(16) 0.19845(11) 0.0354(8) Uani 1 1 d . . . 
H25A H 0.4583 0.1292 0.1959 0.043 Uiso 1 1 calc R . . 
C26 C 0.5153(5) 0.21146(16) 0.23100(11) 0.0370(8) Uani 1 1 d . . . 
H26A H 0.5793 0.1878 0.2506 0.044 Uiso 1 1 calc R . . 
C27 C 0.4929(4) 0.28017(15) 0.23518(10) 0.0312(7) Uani 1 1 d . . . 
H27A H 0.5407 0.3030 0.2580 0.037 Uiso 1 1 calc R . . 
C28 C 0.0947(4) 0.33351(17) 0.15321(11) 0.0313(7) Uani 1 1 d . . . 
H28A H 0.0438 0.2950 0.1671 0.047 Uiso 1 1 calc R . . 
H28B H 0.0340 0.3453 0.1282 0.047 Uiso 1 1 calc R . . 
H28C H 0.0967 0.3723 0.1721 0.047 Uiso 1 1 calc R . . 
C29 C 0.1353(4) 0.31379(17) 0.04732(11) 0.0363(8) Uani 1 1 d . . . 
H29A H 0.1234 0.2844 0.0720 0.044 Uiso 1 1 calc R . . 
H29B H 0.2075 0.2915 0.0272 0.044 Uiso 1 1 calc R . . 
C30 C -0.0236(4) 0.32893(19) 0.02809(11) 0.0385(8) Uani 1 1 d . . . 
H30A H -0.1061 0.3372 0.0496 0.046 Uiso 1 1 calc R . . 
H30B H -0.0591 0.2917 0.0097 0.046 Uiso 1 1 calc R . . 
C31 C 0.0118(6) 0.3925(2) 0.00346(13) 0.0497(10) Uani 1 1 d . . . 
H31A H 0.0455 0.3810 -0.0252 0.060 Uiso 1 1 calc R . . 
H31B H -0.0839 0.4219 0.0021 0.060 Uiso 1 1 calc R . . 
C32 C 0.1431(6) 0.4266(2) 0.02626(14) 0.0615(14) Uani 1 1 d . . . 
H32A H 0.2328 0.4368 0.0072 0.074 Uiso 1 1 calc R . . 
H32B H 0.1047 0.4696 0.0385 0.074 Uiso 1 1 calc R . . 
  
loop_ 
 _atom_site_aniso_label 
 _atom_site_aniso_U_11 
 _atom_site_aniso_U_22 
 _atom_site_aniso_U_33 
 _atom_site_aniso_U_23 
 _atom_site_aniso_U_13 
 _atom_site_aniso_U_12 
Sm1 0.01881(9) 0.01685(9) 0.01704(9) 0.00123(5) -0.00123(5) -0.00022(5) 
O1 0.0239(11) 0.0209(10) 0.0325(11) 0.0024(8) -0.0022(8) 0.0025(8) 
O2 0.0209(10) 0.0210(10) 0.0232(10) 0.0034(8) -0.0018(8) -0.0011(8) 
O3 0.0347(12) 0.0299(11) 0.0331(12) 0.0121(9) -0.0144(10) -0.0103(10) 
C1 0.0367(18) 0.0345(17) 0.0194(15) -0.0046(12) 0.0004(12) 0.0049(14) 
C2 0.0357(18) 0.0321(16) 0.0207(15) 0.0073(12) 0.0050(12) 0.0057(13) 
C3 0.0301(17) 0.0215(14) 0.0331(16) 0.0059(12) 0.0114(13) 0.0010(12) 
C4 0.0178(15) 0.0255(15) 0.0377(17) -0.0076(12) 0.0053(12) -0.0053(11) 
C5 0.0161(14) 0.0398(18) 0.0305(16) -0.0069(13) -0.0001(12) 0.0036(12) 
C6 0.0192(14) 0.0367(17) 0.0254(15) 0.0052(12) -0.0020(12) 0.0099(12) 
C7 0.0283(16) 0.0205(15) 0.0350(17) 0.0046(12) 0.0039(13) 0.0076(12) 
C8 0.0332(17) 0.0221(15) 0.0347(17) -0.0072(13) 0.0025(13) 0.0012(12) 
C9 0.0210(13) 0.0177(13) 0.0207(14) 0.0013(10) 0.0017(11) -0.0013(10) 
C10 0.0285(15) 0.0171(13) 0.0232(14) 0.0017(11) 0.0013(12) 0.0000(11) 
C11 0.049(2) 0.0180(14) 0.0312(17) -0.0047(12) 0.0082(15) -0.0019(13) 
C12 0.063(2) 0.0265(16) 0.0234(15) -0.0035(12) 0.0117(16) -0.0012(16) 
C13 0.047(2) 0.0237(15) 0.0208(14) 0.0027(11) 0.0057(13) -0.0051(14) 
C14 0.0294(15) 0.0173(13) 0.0210(14) 0.0007(10) -0.0001(12) -0.0029(11) 
C15 0.0259(15) 0.0150(13) 0.0263(15) -0.0001(11) 0.0056(11) 0.0024(11) 
C16 0.0272(15) 0.0147(13) 0.0306(15) 0.0007(11) 0.0060(13) 0.0042(11) 
C17 0.0386(19) 0.0204(15) 0.0294(16) 0.0034(12) 0.0056(13) 0.0075(13) 
C18 0.0402(19) 0.0191(15) 0.042(2) 0.0083(12) 0.0140(15) -0.0009(13) 
C19 0.0380(18) 0.0175(15) 0.044(2) 0.0006(13) 0.0076(15) -0.0070(13) 
C20 0.0384(19) 0.0193(14) 0.0316(17) -0.0023(12) 0.0033(13) -0.0013(12) 
C21 0.0272(17) 0.0288(18) 0.067(2) 0.0034(16) 0.0004(17) 0.0084(14) 
C22 0.0295(15) 0.0161(13) 0.0220(14) 0.0042(10) 0.0018(12) -0.0027(11) 
C23 0.0208(14) 0.0212(13) 0.0197(13) 0.0024(10) 0.0015(11) -0.0019(11) 
C24 0.0375(18) 0.0188(14) 0.0290(16) -0.0016(11) -0.0016(13) -0.0039(12) 
C25 0.049(2) 0.0158(14) 0.0410(19) 0.0041(13) -0.0016(15) 0.0020(13) 
C26 0.052(2) 0.0243(16) 0.0350(18) 0.0110(13) -0.0103(16) 0.0040(15) 
C27 0.0460(19) 0.0243(15) 0.0232(15) 0.0047(12) -0.0079(14) -0.0033(14) 
C28 0.0222(15) 0.0309(17) 0.0408(19) 0.0049(14) 0.0033(13) 0.0001(13) 
C29 0.0388(19) 0.0318(17) 0.0383(18) 0.0020(14) -0.0098(15) -0.0100(15) 
C30 0.0338(18) 0.043(2) 0.039(2) -0.0102(15) -0.0039(15) -0.0018(15) 
C31 0.064(3) 0.049(2) 0.036(2) 0.0060(16) -0.022(2) 0.003(2) 
C32 0.070(3) 0.056(3) 0.059(3) 0.036(2) -0.040(2) -0.025(2) 
  
_geom_special_details 
; 
 All esds (except the esd in the dihedral angle between two l.s. planes) 
 are estimated using the full covariance matrix.  The cell esds are taken 
 into account individually in the estimation of esds in distances, angles 
 and torsion angles; correlations between esds in cell parameters are only 
 used when they are defined by crystal symmetry.  An approximate (isotropic) 
 treatment of cell esds is used for estimating esds involving l.s. planes. 
; 
  
loop_ 
 _geom_bond_atom_site_label_1 
 _geom_bond_atom_site_label_2 
 _geom_bond_distance 
 _geom_bond_site_symmetry_2 
 _geom_bond_publ_flag 
Sm1 O3 2.535(2) . ? 
Sm1 O2 2.5436(19) . ? 
Sm1 C9 2.543(3) . ? 
Sm1 O1 2.576(2) . ? 
Sm1 C6 2.631(3) . ? 
Sm1 C5 2.641(3) . ? 
Sm1 C4 2.641(3) . ? 
Sm1 C7 2.660(3) . ? 
Sm1 C3 2.672(3) . ? 
Sm1 C8 2.703(3) . ? 
Sm1 C2 2.721(3) . ? 
Sm1 C1 2.759(3) . ? 
O1 C16 1.408(4) . ? 
O1 C21 1.442(4) . ? 
O2 C23 1.410(3) . ? 
O2 C28 1.439(4) . ? 
O3 C32 1.456(4) . ? 
O3 C29 1.463(4) . ? 
C1 C2 1.401(5) . ? 
C1 C8 1.408(5) . ? 
C2 C3 1.415(5) . ? 
C3 C4 1.402(4) . ? 
C4 C5 1.406(4) . ? 
C5 C6 1.400(4) . ? 
C6 C7 1.412(4) . ? 
C7 C8 1.403(5) . ? 
C9 C14 1.413(4) . ? 
C9 C10 1.419(4) . ? 
C10 C11 1.398(4) . ? 
C10 C15 1.489(4) . ? 
C11 C12 1.382(4) . ? 
C12 C13 1.384(4) . ? 
C13 C14 1.401(4) . ? 
C14 C22 1.493(4) . ? 
C15 C16 1.392(4) . ? 
C15 C20 1.402(4) . ? 
C16 C17 1.397(4) . ? 
C17 C18 1.389(5) . ? 
C18 C19 1.383(5) . ? 
C19 C20 1.388(4) . ? 
C22 C23 1.392(4) . ? 
C22 C27 1.399(4) . ? 
C23 C24 1.379(4) . ? 
C24 C25 1.385(5) . ? 
C25 C26 1.384(5) . ? 
C26 C27 1.379(4) . ? 
C29 C30 1.497(5) . ? 
C30 C31 1.515(5) . ? 
C31 C32 1.484(6) . ? 
  
loop_ 
 _geom_angle_atom_site_label_1 
 _geom_angle_atom_site_label_2 
 _geom_angle_atom_site_label_3 
 _geom_angle 
 _geom_angle_site_symmetry_1 
 _geom_angle_site_symmetry_3 
 _geom_angle_publ_flag 
O3 Sm1 O2 72.53(6) . . ? 
O3 Sm1 C9 119.96(9) . . ? 
O2 Sm1 C9 71.11(7) . . ? 
O3 Sm1 O1 72.96(7) . . ? 
O2 Sm1 O1 103.56(6) . . ? 
C9 Sm1 O1 71.29(8) . . ? 
O3 Sm1 C6 140.74(9) . . ? 
O2 Sm1 C6 94.62(8) . . ? 
C9 Sm1 C6 88.23(9) . . ? 
O1 Sm1 C6 145.95(8) . . ? 
O3 Sm1 C5 159.36(9) . . ? 
O2 Sm1 C5 119.31(8) . . ? 
C9 Sm1 C5 80.66(9) . . ? 
O1 Sm1 C5 116.59(8) . . ? 
C6 Sm1 C5 30.79(10) . . ? 
O3 Sm1 C4 137.10(8) . . ? 
O2 Sm1 C4 149.71(8) . . ? 
C9 Sm1 C4 91.95(9) . . ? 
O1 Sm1 C4 93.90(8) . . ? 
C6 Sm1 C4 58.97(10) . . ? 
C5 Sm1 C4 30.88(10) . . ? 
O3 Sm1 C7 109.79(9) . . ? 
O2 Sm1 C7 83.14(8) . . ? 
C9 Sm1 C7 111.31(9) . . ? 
O1 Sm1 C7 173.30(8) . . ? 
C6 Sm1 C7 30.96(10) . . ? 
C5 Sm1 C7 58.79(10) . . ? 
C4 Sm1 C7 79.94(10) . . ? 
O3 Sm1 C3 106.61(9) . . ? 
O2 Sm1 C3 169.58(8) . . ? 
C9 Sm1 C3 116.93(9) . . ? 
O1 Sm1 C3 85.82(8) . . ? 
C6 Sm1 C3 79.51(10) . . ? 
C5 Sm1 C3 58.45(10) . . ? 
C4 Sm1 C3 30.60(10) . . ? 
C7 Sm1 C3 87.52(9) . . ? 
O3 Sm1 C8 84.57(9) . . ? 
O2 Sm1 C8 91.07(8) . . ? 
C9 Sm1 C8 141.05(10) . . ? 
O1 Sm1 C8 147.65(8) . . ? 
C6 Sm1 C8 58.14(10) . . ? 
C5 Sm1 C8 78.63(9) . . ? 
C4 Sm1 C8 86.87(9) . . ? 
C7 Sm1 C8 30.31(10) . . ? 
C3 Sm1 C8 78.52(9) . . ? 
O3 Sm1 C2 82.56(9) . . ? 
O2 Sm1 C2 141.54(9) . . ? 
C9 Sm1 C2 147.23(10) . . ? 
O1 Sm1 C2 96.27(8) . . ? 
C6 Sm1 C2 86.41(9) . . ? 
C5 Sm1 C2 78.30(10) . . ? 
C4 Sm1 C2 57.91(10) . . ? 
C7 Sm1 C2 78.25(9) . . ? 
C3 Sm1 C2 30.39(10) . . ? 
C8 Sm1 C2 57.15(10) . . ? 
O3 Sm1 C1 74.09(9) . . ? 
O2 Sm1 C1 113.26(8) . . ? 
C9 Sm1 C1 165.57(9) . . ? 
O1 Sm1 C1 119.01(8) . . ? 
C6 Sm1 C1 77.82(9) . . ? 
C5 Sm1 C1 85.41(10) . . ? 
C4 Sm1 C1 77.79(9) . . ? 
C7 Sm1 C1 57.30(9) . . ? 
C3 Sm1 C1 57.26(10) . . ? 
C8 Sm1 C1 29.86(10) . . ? 
C2 Sm1 C1 29.60(10) . . ? 
C16 O1 C21 112.6(2) . . ? 
C16 O1 Sm1 106.87(16) . . ? 
C21 O1 Sm1 125.49(18) . . ? 
C23 O2 C28 113.0(2) . . ? 
C23 O2 Sm1 111.16(15) . . ? 
C28 O2 Sm1 121.75(17) . . ? 
C32 O3 C29 106.2(3) . . ? 
C32 O3 Sm1 124.8(2) . . ? 
C29 O3 Sm1 123.28(18) . . ? 
C2 C1 C8 134.9(3) . . ? 
C2 C1 Sm1 73.70(17) . . ? 
C8 C1 Sm1 72.86(18) . . ? 
C1 C2 C3 135.3(3) . . ? 
C1 C2 Sm1 76.70(18) . . ? 
C3 C2 Sm1 72.89(17) . . ? 
C4 C3 C2 134.4(3) . . ? 
C4 C3 Sm1 73.46(17) . . ? 
C2 C3 Sm1 76.72(17) . . ? 
C3 C4 C5 134.9(3) . . ? 
C3 C4 Sm1 75.94(17) . . ? 
C5 C4 Sm1 74.56(17) . . ? 
C6 C5 C4 135.3(3) . . ? 
C6 C5 Sm1 74.22(17) . . ? 
C4 C5 Sm1 74.56(17) . . ? 
C5 C6 C7 135.4(3) . . ? 
C5 C6 Sm1 74.99(17) . . ? 
C7 C6 Sm1 75.66(17) . . ? 
C8 C7 C6 134.1(3) . . ? 
C8 C7 Sm1 76.54(17) . . ? 
C6 C7 Sm1 73.38(16) . . ? 
C7 C8 C1 135.3(3) . . ? 
C7 C8 Sm1 73.15(17) . . ? 
C1 C8 Sm1 77.28(18) . . ? 
C14 C9 C10 114.4(2) . . ? 
C14 C9 Sm1 123.13(19) . . ? 
C10 C9 Sm1 122.30(19) . . ? 
C11 C10 C9 122.8(3) . . ? 
C11 C10 C15 117.3(3) . . ? 
C9 C10 C15 119.8(3) . . ? 
C12 C11 C10 120.3(3) . . ? 
C13 C12 C11 119.2(3) . . ? 
C12 C13 C14 120.3(3) . . ? 
C13 C14 C9 122.8(3) . . ? 
C13 C14 C22 116.7(3) . . ? 
C9 C14 C22 120.5(3) . . ? 
C16 C15 C20 116.5(3) . . ? 
C16 C15 C10 123.5(3) . . ? 
C20 C15 C10 120.0(3) . . ? 
C15 C16 O1 120.2(2) . . ? 
C15 C16 C17 122.9(3) . . ? 
O1 C16 C17 116.9(3) . . ? 
C18 C17 C16 118.9(3) . . ? 
C19 C18 C17 119.7(3) . . ? 
C18 C19 C20 120.5(3) . . ? 
C19 C20 C15 121.6(3) . . ? 
C23 C22 C27 116.1(3) . . ? 
C23 C22 C14 123.7(3) . . ? 
C27 C22 C14 120.2(3) . . ? 
C24 C23 C22 122.7(3) . . ? 
C24 C23 O2 117.7(3) . . ? 
C22 C23 O2 119.6(2) . . ? 
C23 C24 C25 119.7(3) . . ? 
C26 C25 C24 119.1(3) . . ? 
C27 C26 C25 120.4(3) . . ? 
C26 C27 C22 121.9(3) . . ? 
O3 C29 C30 103.2(3) . . ? 
C29 C30 C31 102.1(3) . . ? 
C32 C31 C30 105.3(3) . . ? 
O3 C32 C31 107.1(3) . . ? 
  
_diffrn_measured_fraction_theta_max    0.997 
_diffrn_reflns_theta_full              27.00 
_diffrn_measured_fraction_theta_full   0.997 
_refine_diff_density_max    1.114 
_refine_diff_density_min   -1.046 
_refine_diff_density_rms    0.085 
